# Supplementary material
Source: PubMed Central journal article supplement (PMC5967653)
Supplement: NIHMS938857-supplement-3.pdf [file NIHMS938857-supplement-3.pdf]

**Supplementary Table 1.** Serum hormones, adipokines, and cytokines in C57BL/6 mice

| Analyte                   | Control     | DIO         | p-value |
|---------------------------|-------------|-------------|---------|
| Insulin (ng/mL)           | 1.04 (0.49) | 2.09 (0.66) | 0.006   |
| IGF-1 (ng/mL)             | 69.7 (12.1) | 85.6 (4.87) | 0.004   |
| Leptin (ng/mL)            | 1.87 (1.20) | 22.5 (5.66) | <0.001  |
| Adiponectin ( $\mu$ g/mL) | 20.0 (4.18) | 24.5 (2.49) | 0.02    |
| Resistin (ng/mL)          | 75.1 (18.4) | 165 (35.4)  | <0.001  |
| PAI-1 (ng/mL)             | 1.41 (0.37) | 1.33 (0.34) | 0.68    |
| GIP (pg/mL)               | 50.4 (5.72) | 87.3 (17.4) | <0.001  |
| GLP-1 (pg/mL)             | 45.1 (30.5) | 60.6 (17.9) | 0.27    |
| IL-1 $\beta$ (pg/mL)      | 236 (67.2)  | 306 (21.7)  | 0.02    |
| IL-6 (pg/mL)              | 9.00 (3.04) | 15.5 (6.50) | 0.03    |
| IL-10 (pg/mL)             | 113 (38.6)  | 163 (38.9)  | 0.03    |
| IL-17A (ng/mL)            | 137 (74.0)  | 304 (154)   | 0.02    |
| IFN $\gamma$ (pg/mL)      | 39.8 (17.3) | 66.5 (23.1) | 0.007   |
| GM-CSF (pg/mL)            | 88.4 (21.7) | 122 (31.5)  | 0.006   |
| MCP-1 (pg/mL)             | 268 (52.0)  | 351 (41.3)  | 0.002   |
| TNF $\alpha$ (ng/mL)      | 1.38 (0.59) | 2.39 (0.90) | 0.002   |

Multiplex immunoassay analyses performed on serum collected at euthanization from mice maintained on control (n=110) or DIO (n=92) diet regimens for 14 weeks; serum from mice in each diet group was randomly combined into 8 separate pools and analyzed. Standard deviations shown in parentheses. Abbreviations: IGF-1, insulin-like growth factor; PAI-1, plasminogen activator inhibitor-1; GIP, gastric inhibitory polypeptide; GLP-1, glucagon-like peptide-1; IL-1 $\beta$ , interleukin 1 beta; IL-6, interleukin 6; IL-10, interleukin 10; IL-17A, interleukin 17A; IFN $\gamma$ , interferon gamma; GM-CSF, granulocyte macrophage colony-stimulating factor; MCP-1, macrophage chemoattractant protein-1; TNF $\alpha$ , tumor necrosis factor alpha.
